# Supplementary material for: Bi-doped carbon dots for a stable lithium metal anode
Source: Royal Society of Chemistry journal article supplement (doi:10.1039/d2cc01334g), 2022-01-01
Supplement: d2cc01334g1.pdf [file d2cc01334g1.pdf]

## Supporting Information:

### Bi-doped Carbon Dots for Stable Lithium Metal Anode

*Hanyu Tu,<sup>a</sup> Shuo Li,<sup>a</sup> Zheng Luo,<sup>a</sup> Laiqiang Xu,<sup>a</sup> Hao Zhang,<sup>a</sup> Yinger Xiang,<sup>a</sup> Wentao  
Deng,<sup>a</sup> Guoqiang Zou,<sup>a</sup> Hongshuai Hou,<sup>\*a</sup> and Xiaobo Ji<sup>a, b</sup>*

*<sup>a</sup>College of Chemistry and Chemical Engineering, Central South University,*

*Changsha, 410083, China*

*<sup>b</sup>School of Materials Science and Engineering, Zhengzhou University, Zhengzhou,*

*450001, China*

#### Corresponding Author

\* Email address: [hs-hou@csu.edu.cn](mailto:hs-hou@csu.edu.cn)

Tel: +86 731-88877237; Fax: +86 731- 88879616.

## **Experimental Section**

### **Preparation of Bi-CDs**

The Bi-CDs were obtained by one-step hydrothermal method. Specifically, 0.55 g glucose monohydrate ( $C_6H_{12}O_6 \cdot H_2O$ ) and 0.57 g bismuth potassium citrate ( $C_{12}H_{10}BiKO_{14}$ ) were dissolved in 60 mL deionized water under constant ultrasound, and then the mixture was transferred into a 100 mL Teflon lined stainless steel autoclave and heated at 160 °C for 12 h. After that, the reaction solution was cooled down to the room temperature naturally, the obtained product was centrifuged for 5 min at the speed of 10000 rpm until the large size particles to be removed. Then, the Bi-CDs purification was further performed by dialyzing in a dialysis bag for 3 days, followed by freeze-dried to obtain brown powder (Bi-CDs).

### **Preparation of sulfur cathode**

The sulfur-carbon cathode was prepared according to previous report<sup>1</sup>. Next, cathode plate was acquired by mixing 80 wt% the pre-prepared sulfur-carbon composites, 10 wt% binder polyvinylidene fluoride (PVDF), and 10 wt% conductive carbon (Super P) in N-methyl pyrrolidinone (NMP). The well-mixed slurry was coated onto Al foil and further dried under vacuum at 60 °C for 12 h. The diameters of cathode, separator, and anode in a full cell are 14mm, 19mm, 16mm, respectively. The areal mass loading of the active material was  $\sim 1.0 \text{ mg cm}^{-2}$ . 80  $\mu\text{L}$  of electrolyte was supplied in each cell.

### **Materials characterization**

The microstructural and surface state of Bi-CDs were characterized by typical transmission electron microscopy (TEM) (JEM-2100F), X-ray diffraction (XRD) (Rigaku Ultima IV), X-ray photoelectron spectroscopy (XPS) (Thermo Scientific Escalab 250Xi) and Fourier transform infrared spectroscopy (FTIR) (AVTA-TAR, 370), respectively. The morphology of  $\text{Li}^+$  ions deposition with and without Bi-CDs added were characterized by scanning transmission electron microscopy (SEM) (JEOL JSM-7610 F Plus). In detail, the coin cells after different cycles were

disassembled in the Ar-filled glove box and then the electrodes were rinsed to remove the residual electrolyte solute by 1,2-dimethoxyethane (DME) and 1,3-dioxolane (DOL) before observation.

### **Electrochemical measurements**

In an Ar-filled glove box ( $O_2 < 0.01$  ppm,  $H_2O < 0.01$  ppm), the Bi-CDs powders were dispersed into conventional electrolyte (1.0 M LiTFSI+2.0 wt%  $LiNO_3$  in DME:DOL=1:1). All of the electrochemical performance tests were carried out at room temperature and using standard CR2016-type coin cells on battery testing system (LAND, Wuhan, China). The Li|Cu half-cells were assembled with lithium foil anode as well as copper foil cathode for coulombic efficiency testing and then the Li|Cu half-cells were cycled within a voltage range of 0 to 1.0 V (vs.  $Li^+/Li$ ) at current densities of 0.5 and 1.0  $mA\ cm^{-2}$ . As for long-term cycling, the Li|Li symmetric-cells were assembled with two lithium foils and then tested at the current densities at 0.5, 1.0, 2.0, 3.0 and 5.0  $mA\ cm^{-2}$  with an areal capacity of 1.0  $mAh\ cm^{-2}$ . Besides, Li-S full-cells were assembled with as-prepared sulfur cathode and lithium anode and were tested within a voltage range of 1.7 to 2.8 V (vs.  $Li^+/Li$ ) at rate of 0.2, 0.5, 1.0 and 2.0 C (1.0 C=1675  $mAh\ g^{-1}$ ). Moreover, the electrochemical impedance spectroscopy (EIS) was tested on Solartron 1260 and 1287 with a frequency range from  $10^{-1}$  to  $10^5$  Hz with the amplitude of 5.0 mV.

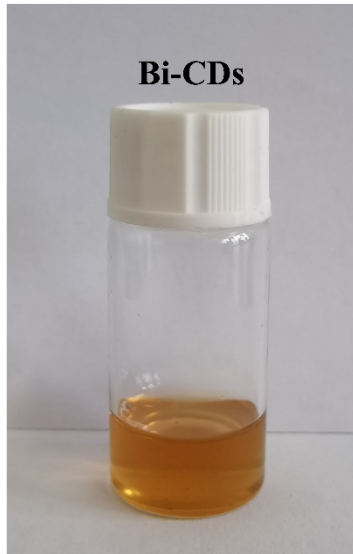

**Figure S1.** Digital photo of the conventional electrolyte with Bi-CDs.

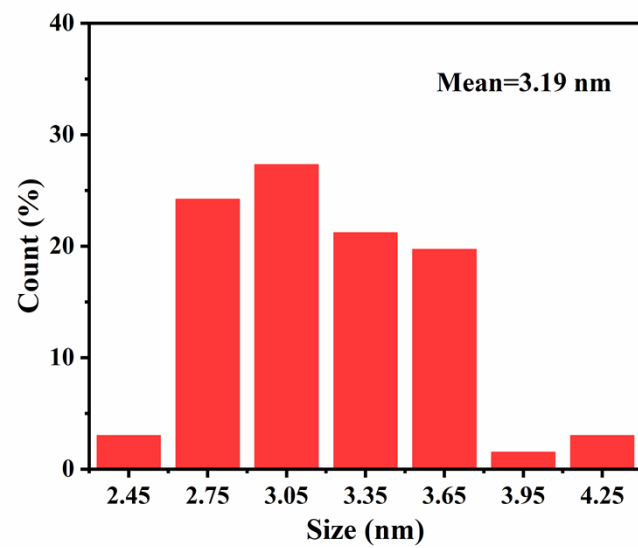

**Figure S2.** The size distribution of Bi-CDs.

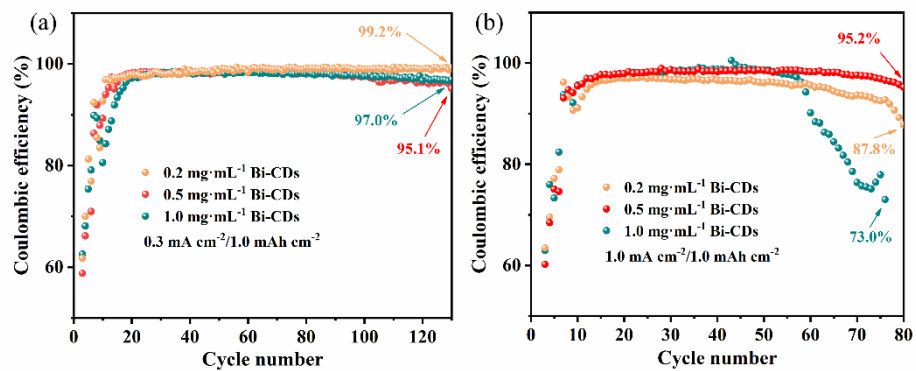

**Figure S3.** The Coulombic efficiency of Li|Cu half-cells with different concentration of the Bi-CDs additives at 0.3 mA cm<sup>-2</sup> (a) and 1.0 mA cm<sup>-2</sup> (b) with a capacity of 1.0 mAh cm<sup>-2</sup>.

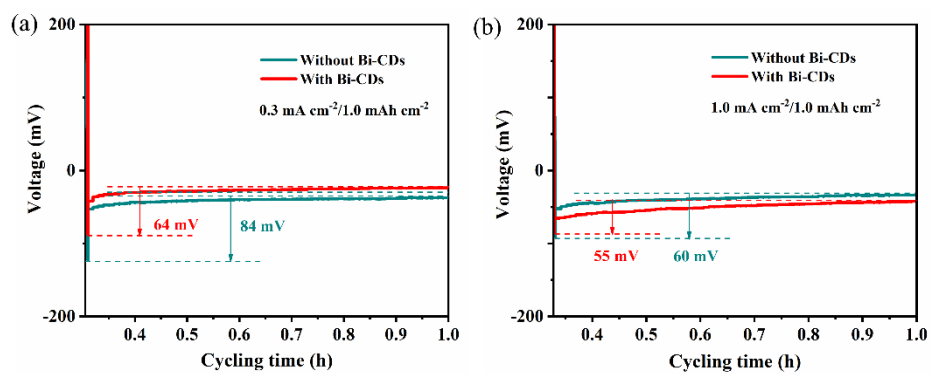

**Figure S4.** The initial circle overpotential of Li|Cu half-cells with and without Bi-CDs at (a) 0.3 mA cm<sup>-2</sup> and (b) 1.0 mA cm<sup>-2</sup> with an areal capacity of 1.0 mAh cm<sup>-2</sup>.

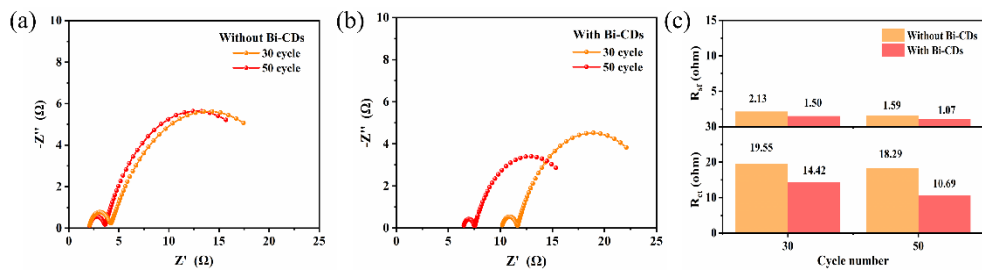

**Figure S5.** The Nyquist plots of Li|Li symmetric-cell with (a) and without Bi-CDs additives (b) at different cycles with their corresponding charge transfer resistance (c).



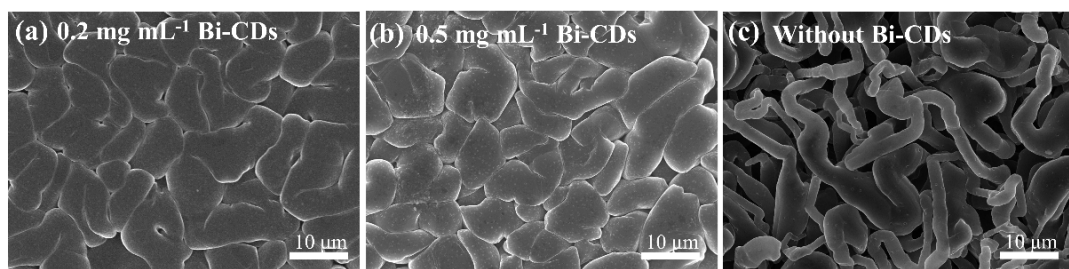

**Figure S6.** SEM images of the lithium ions deposition on the copper foil with Bi-CDs (a, b) and (c) without Bi-CDs at a current density of  $5.0 \text{ mA cm}^{-2}$  and areal capacity of  $1.0 \text{ mAh cm}^{-2}$ .

## Notes and references

1. F. Qin, X. Wang, K. Zhang, J. Fang, J. Li and Y. Lai, *Nano Energy*, 2017, **38**, 137-146.
